# Supplementary material for: Pseudogene OCT4-pg5 Upregulates OCT4B Expression to Promote Bladder Cancer Progression by Competing with miR-145-5p
Source: Research Square preprint supplement (doi:10.21203/rs.3.rs-1528804/v1), 2022-04-19
Supplement: Supplementary file 1 [file 3c62c02f6be9b9069e88ff29.docx]

| Table S6 Primer sequences used for qRT-PCR | |
| --- | --- |
| Genes | Sequences (5’→3’) |
| OCT4-pg5-F | TTGCTGCAGAAGTGGGTGGAGGAAG |
| OCT4-pg5-R | GTACCAAAATGGGAGCCTGGGGC |
| OCT4B-F | CACTTCTACAGACTATTCCTTGG |
| OCT4B -R | GAAGACTTGTAAGAACATAAACACAC |
| miR-145-5p-R | CTCAACTGGTGTCGTGGAGTCGGCAATTCAGTTGAGAGGGATTC |
| miR-145-5p-F | ACACTCCAGCTGGGGTCCAGTTTTCCCAGGA |
| GAPDH-F | GGGAAACTGTGGCGTGAT |
| GAPDH-R | GAGTGGGTGTCGCTGTTGA |
| U6-F | CTCGCTTCGGCAGCACA |
| U6-R | AACGCTTCACGAATTTGCGT |
| E-cadherin-F | TGGAGGAATTCTTGCTTTGC |
| E-cadherin-R | CGCTCTCCTCCGAAGAAACC |
| vimentin-F | GACGCCATCAACACCGAGTT |
| vimentin-R | CTTTGTCGTTGGTTAGCTGGT |
| β-catenin-F | AAAGCGGCTGTTAGTCACTGG |
| β-catenin-R | CGAGTCATTGCATACTGTCCAT |
